# Supplementary material
Source: publisher figshare collection journal article supplement (https://tandf.figshare.com/ndownloader/files/22125435)
Supplement: Supplementary file 1 [file 22125435]

**Search Strategy**

**Search Strategy for Medline and PsycINFO**

1. Stroke.mp. or exp Stroke/
2. Cerebrovascular Disorders/
3. exp "Intracranial Embolism and Thrombosis"/
4. exp Brain Ischemia/
5. ((brain* or cerebr* or intracran* or intracerebral) adj5 (isch?emi* or infarct* or thrombo* or emboli* or occlus*)).mp. [mp=title, abstract, original title, name of substance word, subject heading word, floating sub-heading word, keyword heading word, organism supplementary concept word, protocol supplementary concept word, rare disease supplementary concept word, unique identifier, synonyms]
6. isch?emic stroke*.mp.
7. hemorrhagic stroke*.mp.
8. transient isch?emic attack*.mp.
9. cva*.mp.
10. Hemiplegia/
11. hemipleg*.mp.
12. exp Paresis/ or paresis.mp.
13. paretic.mp.
14. (poststroke or post-stroke).mp.
15. 1 or 2 or 3 or 4 or 5 or 6 or 7 or 8 or 9 or 10 or 11 or 12 or 13 or 14
16. exp Exercise/
17. exercis*.mp.
18. exp Exercise Therapy/
19. physical endurance.mp. or Physical Endurance/
20. physical exertion.mp. or Physical Exertion/
21. physical activ*.mp.
22. Rehabilitation/
23. (run* or physiotherapy or yoga or aerobic or swim* or danc* or walk* or jogging or fitness or resistance or biking or balance or flexibility).mp.
24. 16 or 17 or 18 or 19 or 20 or 21 or 22 or 23
25. exp Cognition/
26. Cognitive Dysfunction/
27. Neuropsychological Tests/
28. Attention/ or Executive Function/
29. cogniti*.mp.
30. exp Memory/
31. processing speed.mp.
32. executive control.mp.
33. visuospatial abilit*.mp.
34. problem solv*.mp. or Problem Solving/
35. decision making.mp. or Decision Making/
36. (set shift* or conflict resolution or selective attention or working memory or verbal item).mp.
37. (cognit* adj3 (func* or declin* or reduc* or impair* or improve* or deficit* or progress* or perform* or abilit*)).mp.
38. 25 or 26 or 27 or 28 or 29 or 30 or 31 or 32 or 33 or 34 or 35 or 36 or 37
39. exp randomized controlled trial/
40. exp randomized controlled trials as topic/
41. Random Allocation/
42. exp Clinical Trials as Topic/
43. controlled clinical trial.pt.
44. random*.ti,ab.
45. trial.ti,ab.
46. systematic review.ti.
47. meta-analysis/
48. 39 or 40 or 41 or 42 or 43 or 44 or 45 or 46 or 47
49. animals/ not (humans/ and animals/)
50. 48 not 49
51. 15 and 24 and 38 and 50

**Search Strategy for EMBASE**

1. Stroke.mp. or exp Stroke/
2. Cerebrovascular Disorders/
3. exp "Intracranial Embolism and Thrombosis"/
4. exp Brain Ischemia/
5. ((brain* or cerebr* or intracran* or intracerebral) adj5 (isch?emi* or infarct* or thrombo* or emboli* or occlus*)).mp. [mp=title, abstract, original title, name of substance word, subject heading word, floating sub-heading word, keyword heading word, organism supplementary concept word, protocol supplementary concept word, rare disease supplementary concept word, unique identifier, synonyms]
6. isch?emic stroke*.mp.
7. hemorrhagic stroke*.mp.
8. transient isch?emic attack*.mp.
9. cva*.mp.
10. Hemiplegia/
11. hemipleg*.mp.
12. exp Paresis/ or paresis.mp.
13. paretic.mp.
14. (poststroke or post-stroke).mp.
15. 1 or 2 or 3 or 4 or 5 or 6 or 7 or 8 or 9 or 10 or 11 or 12 or 13 or 14
16. exp Exercise/
17. exercis*.mp.
18. exp Exercise Therapy/
19. physical endurance.mp. or Physical Endurance/
20. physical exertion.mp. or Physical Exertion/
21. physical activ*.mp.
22. Rehabilitation/
23. (run* or physiotherapy or yoga or aerobic or swim* or danc* or walk* or jogging or fitness or resistance or biking or balance or flexibility).mp.
24. 16 or 17 or 18 or 19 or 20 or 21 or 22 or 23
25. exp Cognition/
26. Cognitive Dysfunction/
27. Neuropsychological Tests/
28. Attention/ or Executive Function/
29. exp Memory/
30. processing speed.mp.
31. executive control.mp.
32. visuospatial abilit*.mp.
33. problem solv*.mp. or Problem Solving/
34. decision making.mp. or Decision Making/
35. (set shift* or conflict resolution or selective attention or working memory or verbal item).mp.
36. (cognit* adj3 (func* or declin* or reduc* or impair* or improve* or deficit* or progress* or perform* or abilit*)).mp.
37. 25 or 26 or 27 or 28 or 29 or 30 or 31 or 32 or 33 or 34 or 35 or 36
38. exp randomized controlled trial/
39. exp randomized controlled trials as topic/
40. Random Allocation/
41. exp Clinical Trials as Topic/
42. controlled clinical trial.pt.
43. trial.ti,ab.
44. systematic review.ti.
45. meta-analysis/
46. 39 or 40 or 41 or 42 or 43 or 44 or 45
47. 15 and 24 and 38 and 50

**Search Strategy for COCHRANE**

1. MeSH descriptor: [Stroke] explode all trees
2. MeSH descriptor: [Cerebrovascular Disorders] explode all trees
3. (brain* or cerebr* or intracran* or intracerebral):ti,ab,kw
4. (isch?emi* or infarct* or thrombo* or emboli* or occlus*):ti,ab,kw
5. (isch?emic stroke* or hemorrhagic stroke* or transient isch?emic attack* or cva* or hemipleg* or paretic or poststroke or post-stroke):ti,ab,kw
6. MeSH descriptor: [Hemiplegia] explode all trees
7. MeSH descriptor: [Paresis] explode all trees
8. #1 or #2 or #3 or #4 or #5 or #6 or #7
9. MeSH descriptor: [Exercise] explode all trees
10. MeSH descriptor: [Physical Endurance] explode all trees
11. MeSH descriptor: [Physical Exertion] explode all trees
12. (run* or physiotherapy or yoga or aerobic or swim* or danc* or walk* or jogging or fitness or resistance or biking or balance or flexibility):ti,ab,kw
13. (physical activ*):ti,ab,kw
14. #9 or #10 or #11 or #12 or #13
15. MeSH descriptor: [Cognition] explode all trees
16. (set shift* or conflict resolution or selective attention or working memory or verbal item or cognit*):ti,ab,kw
17. MeSH descriptor: [Cognitive Dysfunction] explode all trees
18. MeSH descriptor: [Neuropsychological Tests] explode all trees
19. processing speed or executive control or visuospatial abilit* or problem solv* or decision making
20. MeSH descriptor: [Attention] explode all trees
21. MeSH descriptor: [Mental Processes] explode all trees
22. #15 or #16 or #17 or #18 or #19 or #20 or #21
23. (review or randomized controlled trial):ti,ab,kw
24. #8 and #14 and #22 and #23

**Search Strategy for CINAHL**

1. (MH "Stroke") OR "stroke" OR (MH "Intracranial Embolism and Thrombosis") OR (MH "Intracranial Hemorrhage") OR (MH "Cerebrovascular Disorders") OR (MH "Cerebral Small Vessel Diseases") OR (MH "Cerebral Ischemia")
2. (MH "Ischemia") OR "ischemia" OR (MH "Cerebral Ischemia, Transient") OR (MH "Hypoxia-Ischemia, Brain") OR (MH "Cerebral Ischemia")
3. (MH "Hemiplegia") OR "hemiplegia"
4. S1 OR S2 OR S3
5. (MH "Exercise+") OR (MH "Physical Activity") OR (MH "Physical Fitness")
6. (MH "Rehabilitation+")
7. (MH "Rehabilitation Patients")
8. S5 OR S6 OR S7
9. (MH "Executive Function") OR (MH "Cognition") OR (MH "Cognition Disorders")
10. (MH "Neuropsychological Tests")
11. (MH "Attention")
12. (MH "Memory+") OR (MH "Problem Solving")
13. (MH "Rehabilitation, Cognitive")
14. "cognition"
15. "processing speed"
16. "visuospatial ability" OR (MH "Spatial Perception")
17. S9 OR S10 OR S11 OR S12 OR S13 OR S14 OR S15 OR S16
18. (MH "Randomized Controlled Trials") OR "randomized controlled trials" OR (MH "Clinical Trials") OR (MH "Cochrane Library")
19. (MH "Systematic Review") OR (MH "Meta Analysis")
20. S18 OR S19
21. S4 AND S8 AND S17 AND S20
